# Supplementary material for: Attitudes Towards and Compliance with the WHO Surgical Safety Checklist in China: A Multicentre Cross-Sectional Study
Source: Research Square preprint supplement (doi:10.21203/rs.3.rs-106310/v1), 2020-11-18
Supplement: Supplementary file 1 [file 033aad62dea4e41457caef9e.xlsx]

## Sheet: Sheet1
Table 6. Adverse event categories and incidence (number with percentage in parentheses)
				Site A	Site B	Site C	Site D	Site E	Overall
Number of surgical checklists observed				200	60	200	200	200	860
Missing instrumentation leading to intraoperative delay				5(2.5%)	1(1.7%)	2(1%)	48(29%)	11(5.5%)	67 (7.8%)
Missing medication before incision				\	\	16(8%)	\	14(7%)	30(3.4%)
Broken instruments				2(1%)	\	\	4(2%)	1(0.5%)	7(0.8%)
Contaminated instruments				4(2%)	1(1.7%)	3(1.5%)	\	2(1%)	10 (1.2%)
Others (difficulty in achieving central venous access)				\	\	2(1%)	\	\	2 (0.2%)
Total				11(1.1%)	2 (0.7%)	23 (2.3%)	52 (5.2%)	28 (2.8%)	116 (2.7%)
