# Supplementary material for: Attitudes Towards and Compliance with the WHO Surgical Safety Checklist in China: A Multicentre Cross-Sectional Study
Source: Research Square preprint supplement (doi:10.21203/rs.3.rs-106310/v1), 2020-11-18
Supplement: Supplementary file 2 [file 74ba23dc657be72de4366098.xlsx]

## Sheet: Sheet1
Table 3. Site characteristics, number and specialty of operations for observed checklists
Item	Sub-item	Site A	Site B	Site C	Site D	Site E	Total
No of beds		760	1600	1200	1850	1390	6800
No. of Operating Rooms		9	20	45	12	28	114
Hospital level	General Level	Public, level 3	Public, level 3	Public, level 3	Public, level 3	Public, level 3	\
	Star Level	No	No	No	5 star	No	\
No. of surgical checklists observed by specialty	Elective Orthopaedics	159	18	51	196	10	434
	Elective General surgery	21	7	25	\	85	138
	Elective Gynecology	9	6	16	\	62	93
	Elective Urology	11	\	15	\	3	29
	Elective Thoracic Surgery	\	29	31	4	40	104
	Elective Cardiac Surgery	\	\	8	\	\	8
	Elective Neurology Surgery	\	\	6	\	\	6
	Elective Vascular Surgery	\	\	3	\	\	3
	Elective ENT Surgery	\	\	45	\	\	45
	Total	200	60	200	200	200	860
